# Supplementary material
Source: PubMed Central journal article supplement (PMC2435133)
Supplement: emboj200898s2.pdf [file emboj200898s2.pdf]

## Supplementary Figure S2

### Alignment of Mrp/NBP35-like proteins in *Saccharomyces cerevisiae* and *Yarrowia lipolytica*

|                     |                                    | <u>Walker A</u>                       |                                            |
|---------------------|------------------------------------|---------------------------------------|--------------------------------------------|
| ScCfd1p             |                                    | MEEQEIGVPAASLAGIKHIIILISGKGGVGKSS     |                                            |
| YALI0E19074g        |                                    | MYSTATQSSPSLAGVKNIVLVLSGKGGVGKSS      |                                            |
| ScNbp35p            | MTEILPHVNDEVLPAEYELNQPEPEH         | CPGPESDMAGKSDA                        | CGGCANKEICE                                |
| YALI0E02354g        | MPSLVDPVANKTDEGNRDTLKAPEPEH        | CPGTESEEAGKADA                        | CGGCPNQDICE                                |
| YALI0B18590g / Ind1 | MGRFRLIAPIQRSIAIISRLQPITANFHSSPALR | SHENPLGIPKSPASAPRIPRKT                | TRRPEPIAGVKKTIVVSSAKGGVGKST                |
|                     |                                    |                                       | 83                                         |
|                     |                                    |                                       | ↑                                          |
|                     |                                    |                                       | <u>Walker B</u>                            |
| Cfd1p               | VTTQTALTLCSMG-FKVGVL               | DIDLTGPSLPRMFGLENESIYQGPEGWQPVKVETN   | STGSLSVISLGFLLGDRGNSVIWRGPKKTSMIKQF        |
| YALI0E19074g        | VTTQLALTLAAQG-KKVGVL               | DIDLTGPSIPRFFGMEDKQVYQSSAGWVPVYTDASRN | --LCLMSLGFLLSRGRDSSVWRGPRKTAMIRQF          |
| Nbp35p              | FAAMLSWALSADEDLQVGAMLDI            | CGPSLPHMLGC                           | IKETVHESNSGWTPVYVTDN----                   |
| YALI0E02354g        | FSSLLGWGFASDLDRVGLMDIDI            | CGPSLPKMMGSEGEQIHTSLSGWSP             | IYVSDN----LGMMSVGFM                        |
| YALI0B18590g        | VSVNTALSLAKRG-LRVGLLDVD            | IFGPSIPTMFGLSGEP                      | RMTHGKLI                                   |
|                     |                                    |                                       | PMSKFG-----IQVMSMGFLVDP-NKAVAWRGLLVQKALEQL |
|                     |                                    |                                       | 166                                        |
|                     |                                    |                                       | <u>Mrp signature</u>                       |
| Cfd1p               | ISDVAWGELDYLLIDTPPGTS              | DEHISIAEELRYS-KPDGGIVV                | TTPQSVATADV                                |
| YALI0E19074g        | IRDVVWGELDYLLIDTPPGTS              | DEHISIAEELRFCDQILGAVIV                | TTPQGVALADVRKELSF                          |
| Nbp35p              | LKDVDWDKLDYLVIDTPPGTS              | DEHISINKYMRES-GIDGALV                 | VVTPQEVALLDVRKEIDF                         |
| YALI0E02354g        | LKDVDWGNLDYLVVDTPPGTS              | DEHLSVTQYLKES-GVDGAVV                 | ITTPQEVALLDVRKELDF                         |
| YALI0B18590g        | LQDVDWGTLDVLVMDLPPGT               | GDVQLTIAQT                            | VKID---GAIIVSTPQDVALVDVVRGLDL              |
|                     |                                    |                                       | FEKTYTKVLGLVQNMSVFVCPN                     |
|                     |                                    |                                       | CNHETHIF                                   |
|                     |                                    |                                       | 252                                        |
|                     |                                    |                                       | 242 245                                    |
| Cfd1p               | S--SGGGKRLSEQFSVPYLG               | NVPIDPKFVEMIENQVSSK                   | TLVEMYRESSLCPIFEEIMK                       |
| YALI0E19074g        | S--KGGGENLAKQYECKFL                | GTVPIDPKFVLMVENAKGGL                  | QEIYGETDMAKIFAGICDKAFSE                    |
| Nbp35p              | KATTGGGEALCKELGIKFL                | GSVPLDPRIGKSC                         | DMGESFLDNYPD                               |
| YALI0E02354g        | APTTGGGKALAEFNI                    | PFLGSVPLDPRIGKSC                      | DHGESFVEEYPDSPATTA                         |
| YALI0B18590g        | G-VDGAVSKAKSRGLG                   | VLGNVPLDPQICSQSDK                     | GVPAVSGGVQAKYYDKIAEGVAEQLGV                |
|                     |                                    |                                       | 312                                        |
|                     |                                    |                                       | 279                                        |

Common motifs are in grey: Walker A or P-loop, Gx(4)GK[ST], Walker B, DxxG and the Mrp family signature, Wxx[LIVM]D[VFY][LIVM](3)DxPPGT[GS]D (ProSite PS01215). The arrow marks the cleavage site predicted by TargetP, as confirmed by N-terminal sequencing. Conserved cysteines are in yellow. The amino acid numbering corresponds to YALI0B18590/Ind1.
