# Supplementary material
Source: PubMed Central journal article supplement (PMC2435133)
Supplement: emboj200898s3.pdf [file emboj200898s3.pdf]

## Supplementary Figure S3 - Genomic deletion of YALI0B18590g (*IND1*)

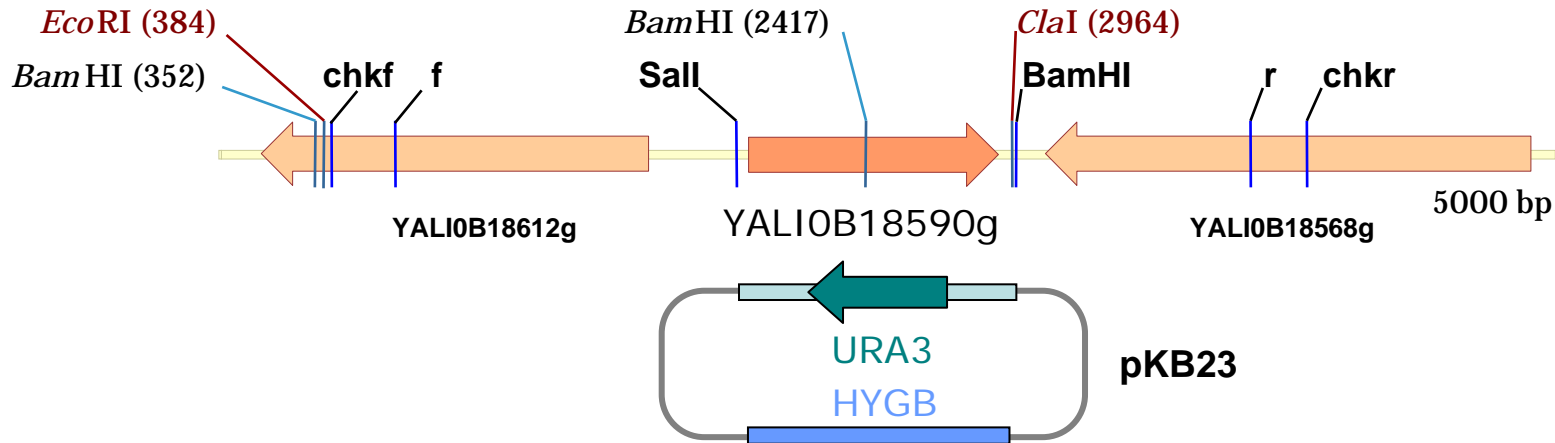

### Transformation of *Y. lipolytica* GB10

(1n, *ura3*, *leu2*, *lys*, MatB, *NDH2i*, NUGM-HT2)

| Round | URA3+ | HygB sensitive | positive in PCR |
|-------|-------|----------------|-----------------|
| 1     | 160   | 15             | 0               |
| 2     | 187   | 20             | 0               |
| 3     | 96    | 19             | 1               |

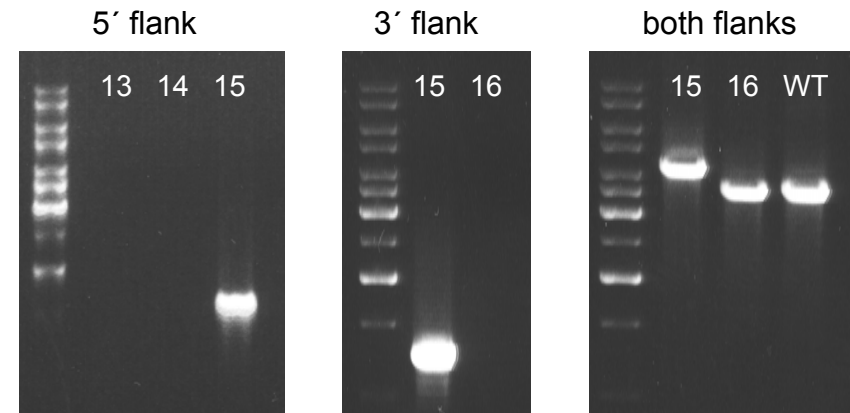

The haploid *Yarrowia lipolytica* GB10 strain was used to generate an *IND1* deletion mutant, *ind1*Δ. The *IND1* gene (systematic name YALI0B18590g) is intron-less. Its open reading frame plus 27 bp upstream and 60 pb downstream were replaced by the *URA3* marker gene using homologous recombination with the plasmid pKB23. More than 440 transformants were screened and the correct gene replacement was confirmed by PCR in one *URA3*<sup>+</sup> transformant (#15).
