# Supplementary material
Source: PubMed Central journal article supplement (PMC2435133)
Supplement: emboj200898s6.pdf [file emboj200898s6.pdf]

## Supplementary Figure S6A – UV/Vis spectra of Ind1 upon air exposure

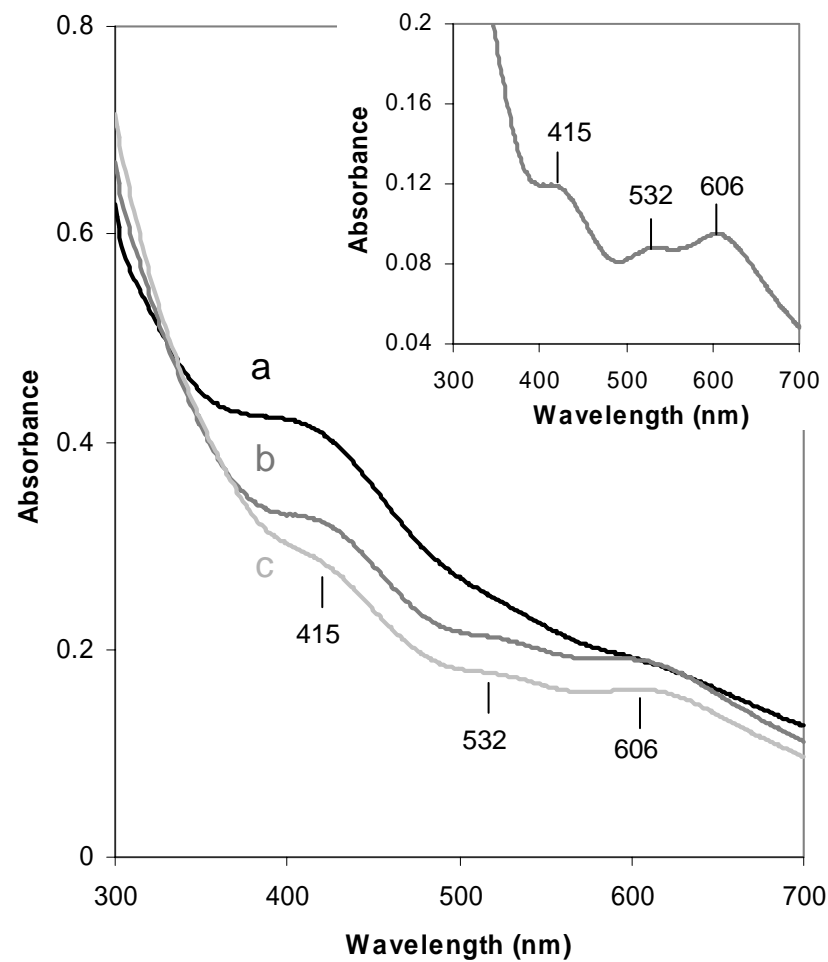

UV/Vis spectra of recombinant Ind1 (1 mg/ml, ~ 30  $\mu$ M) immediately after reconstitution of the Fe-S cluster (a), and after exposure to air for 10 min (b) and 30 min (c). Inset: subtraction of spectrum (b) minus 0.5x (a) reveals a difference spectrum with absorbances of a species associated with breakdown of the [4Fe-4S] cluster.

## Supplementary Figure S6B - EPR spectrum of Ind1 compared to *S. cerevisiae* Cfd1

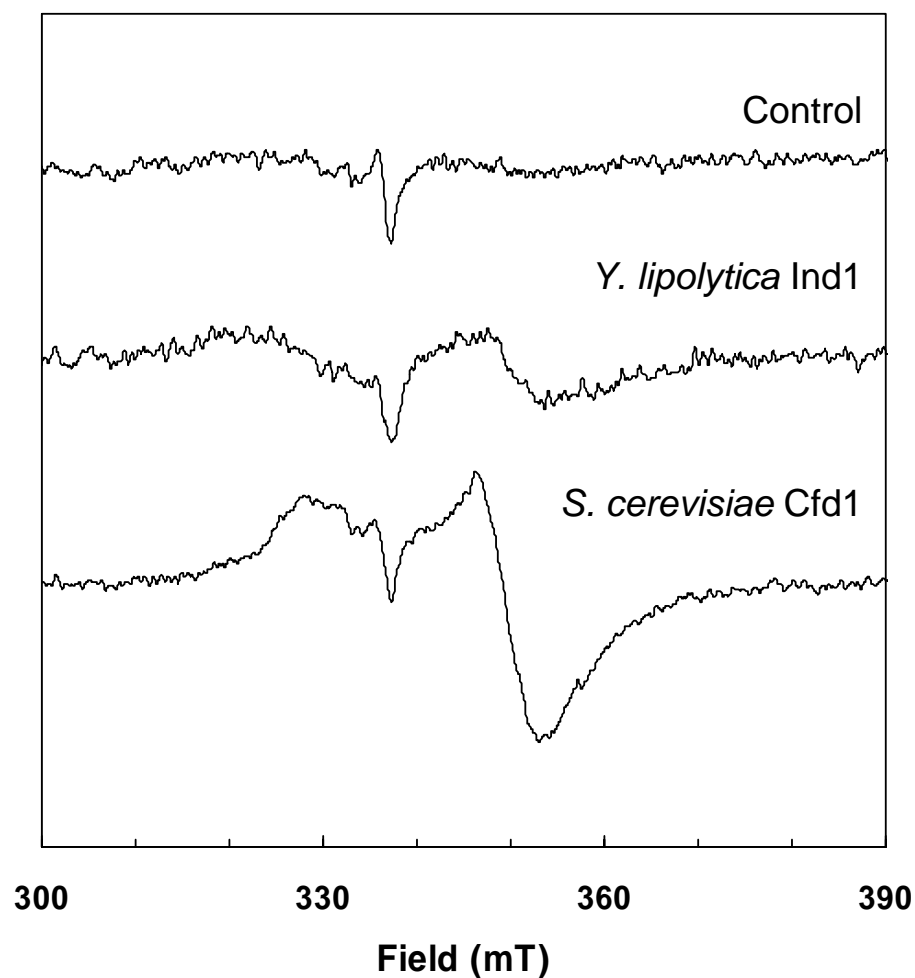

After *in vitro* reconstitution and dithionite reduction *Yarrowia lipolytica* Ind1 can bind an EPR-active species similar to the [4Fe-4S]<sup>1+</sup> cluster of *in vitro* reconstituted *Saccharomyces cerevisiae* Cfd1. The high-molecular mass fractions of an *in vitro* Fe-S reconstitution mixture in the absence of protein (top), presence of Ind1 (middle, 1.3 mg/ml, 40  $\mu$ M) or presence of Cfd1 (bottom) were desalted and treated with 2 mM sodium dithionite. Conditions for reconstitution were identical to those used by Netz et al. (2007). EPR conditions: temperature, 10 K; microwave power, 2.0 mW; microwave frequency,  $9.46 \pm 1$  MHz; modulation frequency, 100 kHz; modulation amplitude, 1.25 mT.
